# Supplementary material
Source: publisher figshare collection journal article supplement (https://tandf.figshare.com/ndownloader/files/25653436)
Supplement: Supplementary file 1 [file 25653436]

## Sheet: Sheet1
Table S1. Strains, genotypes, geographical origin, year of isolation and nucleotide composition of each Sporothrix individual analysed
Strain	Species	Population	Location	Year of iusolation (tip dates)	A	C	G	T	N	genome size	SRA/GENBANK acession number
5110 (Reference)	S. brasiliensis	SbRJ	Rio de Janeiro,Brazil	2007	0.2264	0.2739	0.2733	0.2264	0	33205847
A001	S. brasiliensis	SbFD	Brasília, Brazil	2016	0.2273	0.2734	0.2717	0.2276	0.0001	33982104	SRR12483725
A003	S. schenckii	SsSA	Brasília, Brazil	2015	0.2256	0.2743	0.2743	0.2258	0.0001	33107675	SRR12483724
A005	S. brasiliensis	SbFD	Brasília, Brazil	2018	0.2275	0.2718	0.2734	0.2273	0.0001	33792787	SRR12483723
ATCC58251	S. schenckii	SsCA/NA	Puerto Rico	1978+-5 anos	0.2242	0.2762	0.2753	0.2243	0.0012	32228000
CBS120340	S. globosa	nd	Spain	1985	0.2278	0.272	0.2717	0.2285	0.0004	33473551
SS01	S. globosa	nd	China	2010	0.2279	0.2719	0.2718	0.2284	0.0004	33493113
RCEF264	S. insectorum	nd	China	nd	0.2302	0.2694	0.2701	0.2303	0.0054	34722120
SPA8	S. pallida	nd	Italy	2010	0.236	0.2639	0.2642	0.236	0	37827857
SsEM7	S. schenckii	SsSA	Medellin, Colombia	2012	0.2258	0.2739	0.2741	0.2261	0.0007	32872446
SsMS1	S. schenckii	SsSA	Medellin, Colombia	2012	0.2256	0.2746	0.2743	0.2255	0	32668903
1099-18	S. brasiliensis	SsSA	USA	1970	0.2251	0.2747	0.2749	0.2253	0	32375103
s15677	S. brasiliensis	SbRJ	Rio de Janeiro,Brazil	1999	0.2257	0.274	0.2736	0.2267	0.0001	33190570	SRR12483729
s28606	S. brasiliensis	SbRJ	Rio de Janeiro,Brazil	2005	0.226	0.2743	0.2733	0.2264	0.0001	33199121	SRR12483728
s34180	S. brasiliensis	SbRJ	Rio de Janeiro,Brazil	2008	0.2352	0.2646	0.263	0.2371	0.0002	37262919	SRR12483727
s48605	S. brasiliensis	SbRJ	Rio de Janeiro,Brazil	2016	0.2262	0.274	0.2736	0.2263	0.0001	33201696	SRR12483726
accession	study	object_status	bioproject_accession	biosample_accession	library_ID	title	library_strategy	library_source	library_selection	library_layout	platform	instrument_model	design_description	filetype	fasta_file	assembly	filename	filename2	filename3	filename4	filename5	filename6	filename7	filename8
SRR12483729	SRP278217	new	PRJNA607682	SAMN14463898	s1	Population genomics of Sporothrix	WGS	GENOMIC	RANDOM	paired	ILLUMINA	Illumina NovaSeq 6000	From each isolate, we extracted 1 g of DNA, as described above. Next, we prepared paired-end libraries using the NEBNext Ultra DNA Library Prep Kit for Illumina. The libraries were quantified using the NEBNext Library Quant Kit for Illumina (New England Biolabs). We pooled equimolar amounts of each library together and sequenced them using Illumina techology	fastq			s15677_1.fastq.gz	s15677_2.fastq.gz
SRR12483728	SRP278217	new	PRJNA607682	SAMN14463899	s2	Population genomics of Sporothrix	WGS	GENOMIC	RANDOM	paired	ILLUMINA	Illumina NovaSeq 6000	From each isolate, we extracted 1 g of DNA, as described above. Next, we prepared paired-end libraries using the NEBNext Ultra DNA Library Prep Kit for Illumina. The libraries were quantified using the NEBNext Library Quant Kit for Illumina (New England Biolabs). We pooled equimolar amounts of each library together and sequenced them using Illumina techology	fastq			s28606_1.fastq.gz	s28606_2.fastq.gz
SRR12483727	SRP278217	new	PRJNA607682	SAMN14463900	s3	Population genomics of Sporothrix	WGS	GENOMIC	RANDOM	paired	ILLUMINA	Illumina NovaSeq 6000	From each isolate, we extracted 1 g of DNA, as described above. Next, we prepared paired-end libraries using the NEBNext Ultra DNA Library Prep Kit for Illumina. The libraries were quantified using the NEBNext Library Quant Kit for Illumina (New England Biolabs). We pooled equimolar amounts of each library together and sequenced them using Illumina techology	fastq			s34180_1.fastq.gz	s34180_2.fastq.gz
SRR12483726	SRP278217	new	PRJNA607682	SAMN14463901	s4	Population genomics of Sporothrix	WGS	GENOMIC	RANDOM	paired	ILLUMINA	Illumina NovaSeq 6000	From each isolate, we extracted 1 g of DNA, as described above. Next, we prepared paired-end libraries using the NEBNext Ultra DNA Library Prep Kit for Illumina. The libraries were quantified using the NEBNext Library Quant Kit for Illumina (New England Biolabs). We pooled equimolar amounts of each library together and sequenced them using Illumina techology	fastq			s48605_1.fastq.gz	s48605_2.fastq.gz
SRR12483725	SRP278217	new	PRJNA607682	SAMN14989853	a1	Population genomics of Sporothrix	WGS	GENOMIC	RANDOM	paired	ILLUMINA	Illumina NovaSeq 6000	From each isolate, we extracted 1 g of DNA, as described above. Next, we prepared paired-end libraries using the NEBNext Ultra DNA Library Prep Kit for Illumina. The libraries were quantified using the NEBNext Library Quant Kit for Illumina (New England Biolabs). We pooled equimolar amounts of each library together and sequenced them using Illumina techology	fastq			A001_1.fastq.gz	A001_2.fastq.gz
SRR12483724	SRP278217	new	PRJNA607682	SAMN14989854	a3	Population genomics of Sporothrix	WGS	GENOMIC	RANDOM	paired	ILLUMINA	Illumina NovaSeq 6000	From each isolate, we extracted 1 g of DNA, as described above. Next, we prepared paired-end libraries using the NEBNext Ultra DNA Library Prep Kit for Illumina. The libraries were quantified using the NEBNext Library Quant Kit for Illumina (New England Biolabs). We pooled equimolar amounts of each library together and sequenced them using Illumina techology	fastq			A003_1.fastq.gz	A003_2.fastq.gz
SRR12483723	SRP278217	new	PRJNA607682	SAMN14989855	a5	Population genomics of Sporothrix	WGS	GENOMIC	RANDOM	paired	ILLUMINA	Illumina NovaSeq 6000	From each isolate, we extracted 1 g of DNA, as described above. Next, we prepared paired-end libraries using the NEBNext Ultra DNA Library Prep Kit for Illumina. The libraries were quantified using the NEBNext Library Quant Kit for Illumina (New England Biolabs). We pooled equimolar amounts of each library together and sequenced them using Illumina techology	fastq			A005_1.fastq.gz	A005_2.fastq.gz
SRR12483722	SRP278217	new	PRJNA607682	SAMN07585147	SsEM7	Population genomics of Sporothrix	WGS	GENOMIC	RANDOM	paired	ILLUMINA	Illumina HiSeq 2000	From each isolate, we extracted 1 g of DNA, as described above. Next, we prepared paired-end libraries using the NEBNext Ultra DNA Library Prep Kit for Illumina. The libraries were quantified using the NEBNext Library Quant Kit for Illumina (New England Biolabs). We pooled equimolar amounts of each library together and sequenced them using Illumina techology	fastq			SsEM7_GAGTGG_L002_R1_001.fastq.gz	SsEM7_GAGTGG_L002_R2_001.fastq.gz
SRR12483721	SRP278217	new	PRJNA607682	SAMN07585146	SsMS1	Population genomics of Sporothrix	WGS	GENOMIC	RANDOM	paired	ILLUMINA	Illumina HiSeq 2000	From each isolate, we extracted 1 g of DNA, as described above. Next, we prepared paired-end libraries using the NEBNext Ultra DNA Library Prep Kit for Illumina. The libraries were quantified using the NEBNext Library Quant Kit for Illumina (New England Biolabs). We pooled equimolar amounts of each library together and sequenced them using Illumina techology	fastq			SsMS1_GGTAGC_L002_R1_001.fastq.gz	SsMS1_GGTAGC_L002_R2_001.fastq.gz
